# Supplementary material
Source: PubMed Central journal article supplement (PMC6939192)
Supplement: EMBJ-39-e101259-s001.pdf [file EMBJ-39-e101259-s001.pdf]

---

## Table of Contents

|                         |          |
|-------------------------|----------|
| Appendix Table S1       | Page 2-3 |
| Appendix Table S2       | Page 4   |
| Appendix Table S3       | Page 5   |
| Appendix Table S4       | Page 6   |
| Appendix Table S5       | Page 7   |
| Appendix Table S6       | Page 8   |
| Appendix Table S7       | Page 9   |
| Appendix Table S8       | Page 10  |
| Appendix Table S9       | Page 11  |
| Appendix Table S10      | Page 12  |
| Appendix Table S11      | Page 13  |
| Appendix Table S12      | Page 14  |
| Appendix Table S13      | Page 15  |
| Supplemental References | Page 16  |
| Appendix Figure S1      | Page 17  |
| Appendix Figure S2      | Page 18  |
| Appendix Figure S3      | Page 19  |
| Appendix Figure S4      | Page 20  |
| Appendix Figure S5      | Page 21  |
| Appendix Figure S6      | Page 22  |
| Appendix Figure S7      | Page 23  |

## Supplementary Tables

Appendix Table S1. Knocking down *Nipped-A* lengthens the period of locomotor rhythm

| Genotype                                                 | Period(hr) $\pm$ SEM              | Power $\pm$ SEM                   | %Rhythmic | N   |
|----------------------------------------------------------|-----------------------------------|-----------------------------------|-----------|-----|
| <i>timG4/+;Udcr2UNipped-ARNai-1</i>                      | 25.89 $\pm$ 0.07 <sup>#####</sup> | 58.96 $\pm$ 4.24 <sup>***</sup>   | 76        | 150 |
| <i>timG4/+;Udcr2UNipped-ARNai-2</i>                      | 25.27 $\pm$ 0.35 <sup>#####</sup> | 7.90 $\pm$ 2.11 <sup>#####</sup>  | 9         | 100 |
| <i>timG4/+;Udcr2UNipped-ARNai-3</i>                      | 25.25 $\pm$ 0.20 <sup>#####</sup> | 11.69 $\pm$ 2.11 <sup>#####</sup> | 23        | 69  |
| <i>timG4/+;Udcr2UNipped-ARNai-4</i>                      | 27.25 $\pm$ 0.13 <sup>#####</sup> | 40.09 $\pm$ 6.42 <sup>#####</sup> | 74        | 38  |
| <i>timG4/+;Udcr2UNipped-ARNai-5</i>                      | 27.25 $\pm$ 0.14 <sup>#####</sup> | 52.90 $\pm$ 8.12 <sup>#####</sup> | 69        | 39  |
| <i>timG4UNipped-ARNai;Udcr2/+6</i>                       | 25.85 $\pm$ 0.08 <sup>#####</sup> | 45.73 $\pm$ 4.12 <sup>#####</sup> | 78        | 81  |
| <i>timG4/+;Udcr2/+</i>                                   | 23.61 $\pm$ 0.03                  | 138.00 $\pm$ 4.68                 | 100       | 127 |
| <i>Udcr2/+;cryG4-16UNipped-ARNai-1</i>                   | 27.01 $\pm$ 0.09 <sup>#####</sup> | 73.62 $\pm$ 6.15 <sup>***</sup>   | 92        | 86  |
| <i>Udcr2/+;cryG4-16UNipped-ARNai-2</i>                   | 25.77 $\pm$ 0.19 <sup>#####</sup> | 27.44 $\pm$ 4.24 <sup>###</sup>   | 60        | 60  |
| <i>Udcr2/+;cryG4-16UNipped-ARNai-3</i>                   | 26.58 $\pm$ 0.17 <sup>#####</sup> | 47.06 $\pm$ 5.33 <sup>***</sup>   | 80        | 66  |
| <i>Udcr2/+;cryG4-16UNipped-ARNai-4</i>                   | 26.42 $\pm$ 0.14 <sup>#####</sup> | 149.72 $\pm$ 9.99 <sup>**</sup>   | 100       | 32  |
| <i>Udcr2/+;cryG4-16UNipped-ARNai-5</i>                   | 26.76 $\pm$ 0.13 <sup>#####</sup> | 137.31 $\pm$ 9.55 <sup>*</sup>    | 100       | 48  |
| <i>Udcr2UNipped-ARNai;cryG4-16/+6</i>                    | 26.45 $\pm$ 0.07 <sup>#####</sup> | 105.75 $\pm$ 5.29                 | 96        | 99  |
| <i>Udcr2/+;cryG4-16/+</i>                                | 24.91 $\pm$ 0.08                  | 111.18 $\pm$ 5.03                 | 98        | 129 |
| <i>pdfG4-Udcr2/+;UNipped-ARNai-1/+</i>                   | 24.96 $\pm$ 0.12 <sup>###</sup>   | 52.49 $\pm$ 4.77 <sup>***</sup>   | 85        | 82  |
| <i>pdfG4-Udcr2/+;UNipped-ARNai-2/+</i>                   | 24.37 $\pm$ 0.17 <sup>###</sup>   | 25.34 $\pm$ 3.33 <sup>***</sup>   | 70        | 63  |
| <i>pdfG4-Udcr2/+;UNipped-ARNai-3/+</i>                   | 24.57 $\pm$ 0.18 <sup>###</sup>   | 27.78 $\pm$ 2.85 <sup>#####</sup> | 81        | 42  |
| <i>pdfG4-Udcr2/+;UNipped-ARNai-4/+</i>                   | 25.61 $\pm$ 0.15 <sup>#####</sup> | 87.57 $\pm$ 8.48 <sup>###</sup>   | 98        | 65  |
| <i>pdfG4-Udcr2/+;UNipped-ARNai-5/+</i>                   | 25.56 $\pm$ 0.16 <sup>#####</sup> | 86.31 $\pm$ 9.81 <sup>###</sup>   | 90        | 48  |
| <i>pdfG4-Udcr2UNipped-ARNai-6</i>                        | 25.57 $\pm$ 0.10 <sup>#####</sup> | 66.60 $\pm$ 5.01 <sup>#####</sup> | 88        | 113 |
| <i>pdfG4-Udcr2/+</i>                                     | 24.61 $\pm$ 0.02                  | 114.98 $\pm$ 5.59                 | 96        | 147 |
| <i>UNipped-ARNai-1/+</i>                                 | 23.61 $\pm$ 0.00                  | 68.70 $\pm$ 4.25                  | 99        | 68  |
| <i>UNipped-ARNai-2/+</i>                                 | 23.60 $\pm$ 0.04                  | 50.04 $\pm$ 6.18                  | 86        | 49  |
| <i>UNipped-ARNai-3/+</i>                                 | 23.53 $\pm$ 0.04                  | 66.55 $\pm$ 7.16                  | 100       | 43  |
| <i>UNipped-ARNai-4/+</i>                                 | 23.94 $\pm$ 0.05                  | 126.34 $\pm$ 5.63                 | 98        | 60  |
| <i>UNipped-ARNai-5/+</i>                                 | 23.73 $\pm$ 0.03                  | 143.47 $\pm$ 4.98                 | 100       | 92  |
| <i>UNipped-ARNai-6/+</i>                                 | 23.65 $\pm$ 0.03                  | 109.76 $\pm$ 5.53                 | 99        | 71  |
| 18°C $\rightarrow$ 29°C                                  |                                   |                                   |           |     |
| <i>Udcr2/+;cryG4-16UNipped-ARNai-4</i>                   | 26.54 $\pm$ 0.13 <sup>#####</sup> | 90.88 $\pm$ 10.56                 | 77        | 56  |
| <i>Udcr2/tubG80<sup>ts</sup>;cryG4-16UNipped-ARNai-4</i> | 26.29 $\pm$ 0.10 <sup>#####</sup> | 99.53 $\pm$ 11.99                 | 76        | 45  |
| <i>Udcr2/tubG80<sup>ts</sup>;cryG4-16/+</i>              | 25.24 $\pm$ 0.08                  | 116.17 $\pm$ 13.38                | 80        | 40  |
| <i>Udcr2/+;cryG4-16/+</i>                                | 24.69 $\pm$ 0.17                  | 80.98 $\pm$ 12.53                 | 79        | 33  |
| <i>UNipped-ARNai-4/+</i>                                 | 23.51 $\pm$ 0.03                  | 106.74 $\pm$ 11.58                | 87        | 39  |
| <i>tubG80<sup>ts</sup>/+</i>                             | 23.64 $\pm$ 0.03                  | 88.18 $\pm$ 9.38                  | 75        | 63  |
| <i>tubG80<sup>ts</sup>/+;UNipped-ARNai-4/+</i>           | 23.68 $\pm$ 0.04                  | 107.89 $\pm$ 9.35                 | 93        | 44  |
| 29°C $\rightarrow$ 18°C                                  |                                   |                                   |           |     |
| <i>Udcr2/+;cryG4-16UNipped-ARNai-4</i>                   | 26.50 $\pm$ 0.28 <sup>#####</sup> | 26.75 $\pm$ 4.48                  | 45        | 51  |
| <i>Udcr2/tubG80<sup>ts</sup>;cryG4-16UNipped-ARNai-4</i> | 24.73 $\pm$ 0.12 <sup>###</sup>   | 25.48 $\pm$ 3.73 <sup>###</sup>   | 61        | 49  |

---

|                                                |                             |                           |     |    |
|------------------------------------------------|-----------------------------|---------------------------|-----|----|
| <b>Udcr2/tubG80<sup>ts</sup>;cryG4-16/+</b>    | 24.52±0.17                  | 55.27±6.79                | 83  | 47 |
| <b>Udcr2/+;cryG4-16/+</b>                      | 25.64±0.23                  | 31.68±5.81                | 53  | 40 |
| <b>UNipped-ARNAi-4/+</b>                       | 24.10±0.10                  | 24.27±3.87                | 75  | 32 |
| <b>tubG80<sup>ts</sup>/+</b>                   | 23.70±0.06                  | 39.91±4.58                | 93  | 45 |
| <b>tubG80<sup>ts</sup>/+;UNipped-ARNAi-4/+</b> | 23.72±0.06                  | 34.30±4.13                | 70  | 62 |
| <b>Drug treated</b>                            |                             |                           |     |    |
| <b>Udcr2/+;pdf-GS/+</b>                        | 25.08±0.10                  | 94.44±5.09                | 100 | 49 |
| <b>UNipped-ARNAi/+-4</b>                       | 24.04±0.04                  | 134.11±5.44               | 100 | 50 |
| <b>Udcr2/+;pdf-GS/UNipped-ARNAi-4</b>          | 25.94±0.12 <sup>#####</sup> | 73.34±7.50 <sup>###</sup> | 88  | 41 |
| <b>Ethanol treated</b>                         |                             |                           |     |    |
| <b>Udcr2/+;pdf-GS/+</b>                        | 23.63±0.05                  | 122.34±7.85               | 97  | 31 |
| <b>UNipped-ARNAi-4/+</b>                       | 23.84±0.04                  | 115.24±6.16               | 98  | 40 |
| <b>Udcr2/+;pdf-GS/UNipped-ARNAi-4</b>          | 23.98±0.05 <sup>###</sup>   | 119.19±7.97               | 97  | 32 |

---

One-way ANOVA,  $P < 0.001$ . Tukey's multiple comparison test, \* $P < 0.05$ , \*\* $P < 0.01$ , \*\*\* $P < 0.001$  when compared with G4 and Udcr2; # $P < 0.05$ , ## $P < 0.01$ , ### $P < 0.001$  when compared with URNAi. 18°C→29°C, flies raised at 18°C and tested at 29°C; 29°C→18°C, flies raised at 29°C and tested at 18°C. Drug treated, flies were treated with RU486 after eclosion; ethanol treated, flies were treated with ethanol instead of RU486 after eclosion. \*\*\*\* $P < 0.001$  when compared with Udcr2/+;pdf-GS/+, ##### $P < 0.001$  when compared with UNipped-ARNAi-4/+. G4, GAL4; U, UAS.

**Appendix Table S2. Over-expressing *Nipped-A* rescues the long period phenotype caused by knocking down *Nipped-A***

| Genotype                                       | Period(hr) $\pm$ SEM              | Power $\pm$ SEM                   | %Rhythmic | N  |
|------------------------------------------------|-----------------------------------|-----------------------------------|-----------|----|
| <i>UNipped-A/+</i>                             | 23.61 $\pm$ 0.03                  | 106.69 $\pm$ 5.63                 | 98        | 61 |
| <i>UNipped-ARNAi-4/+</i>                       | 23.76 $\pm$ 0.05                  | 110.54 $\pm$ 7.57                 | 97        | 36 |
| <i>UNipped-A/+;UNipped-ARNAi-4/+</i>           | 23.85 $\pm$ 0.04                  | 102.41 $\pm$ 6.99                 | 96        | 68 |
| <i>timG4/+;Udcr2/+</i>                         | 24.63 $\pm$ 0.05                  | 125.82 $\pm$ 8.47                 | 100       | 47 |
| <i>timG4/UNipped-A;Udcr2/+</i>                 | 24.51 $\pm$ 0.05 <sup>###</sup>   | 100.12 $\pm$ 7.89                 | 95        | 43 |
| <i>timG4/+;Udcr2/UNipped-ARNAi-4</i>           | 27.12 $\pm$ 0.15 <sup>#####</sup> | 51.72 $\pm$ 4.14 <sup>#####</sup> | 84        | 74 |
| <i>timG4/UNipped-A;Udcr2/UNipped-ARNAi-4</i>   | 24.09 $\pm$ 0.12 <sup>++++†</sup> | 35.33 $\pm$ 8.59 <sup>†††</sup>   | 61        | 28 |
| <i>pdfG4-Udcr2/+</i>                           | 24.58 $\pm$ 0.03                  | 166.35 $\pm$ 7.16                 | 100       | 76 |
| <i>pdfG4-Udcr2/UNipped-A</i>                   | 24.58 $\pm$ 0.04 <sup>###</sup>   | 109.89 $\pm$ 7.05 <sup>***</sup>  | 98        | 60 |
| <i>pdfG4-Udcr2/+;UNipped-ARNAi-4/+</i>         | 25.88 $\pm$ 0.16 <sup>#####</sup> | 84.51 $\pm$ 7.67 <sup>***</sup>   | 96        | 53 |
| <i>pdfG4-Udcr2/UNipped-A;UNipped-ARNAi-4/+</i> | 24.87 $\pm$ 0.04 <sup>++++†</sup> | 115.20 $\pm$ 7.82 <sup>†</sup>    | 97        | 70 |

One-way ANOVA,  $P < 0.001$ , Tukey's multiple comparison test, <sup>\*\*\*</sup> $P < 0.001$  when compared with G4 control, <sup>###</sup> $P < 0.001$  when compared with UAS control; <sup>+++</sup> $P < 0.001$  when compared with *timG4/+;Udcr2/UNipped-ARNAi-4* or *pdfG4-Udcr2/+;UNipped-ARNAi-4/+*, <sup>†††</sup> $P < 0.001$  when compared with *timG4/UNipped-A;Udcr2/+* or *pdfG4-Udcr2/UNipped-A*. G4, GAL4; U, UAS.

Appendix Table S3. Genetic interaction between *Nipped-A* and *GFP*

| Genotype                                  | Period(hr) $\pm$ SEM              | Power $\pm$ SEM                 | %Rhythmic | N  |
|-------------------------------------------|-----------------------------------|---------------------------------|-----------|----|
| <i>pdfG4-Udcr2/UNipped-ARNAi-6</i>        | 25.78 $\pm$ 0.13 <sup>****#</sup> | 48.62 $\pm$ 5.11 <sup>###</sup> | 82        | 61 |
| <i>pdfG4-Udcr2/+;UGFP/+</i>               | 24.36 $\pm$ 0.04 <sup>###</sup>   | 78.51 $\pm$ 6.18                | 88        | 56 |
| <i>pdfG4-Udcr2/UNipped-ARNAi-6;UGFP/+</i> | 25.88 $\pm$ 0.12 <sup>†††</sup>   | 52.72 $\pm$ 5.77                | 89        | 28 |
| <i>pdfG4-Udcr2/+</i>                      | 24.54 $\pm$ 0.04                  | 73.79 $\pm$ 5.41                | 89        | 66 |
| <i>UNipped-ARNAi-6/+</i>                  | 23.68 $\pm$ 0.04                  | 108.01 $\pm$ 6.81               | 100       | 40 |
| <i>UGFP/+</i>                             | 23.53 $\pm$ 0.02                  | 90.17 $\pm$ 10.49               | 91        | 33 |
| <i>UNipped-ARNAi-6/+;UGFP/+</i>           | 23.77 $\pm$ 0.04                  | 102.76 $\pm$ 8.15               | 88        | 40 |
| <i>timG4/UNipped-ARNAi-6;Udcr2/+</i>      | 25.95 $\pm$ 0.11 <sup>****#</sup> | 49.88 $\pm$ 6.71 <sup>###</sup> | 86        | 37 |
| <i>timG4/+;Udcr2/UGFP</i>                 | 24.15 $\pm$ 0.06 <sup>****#</sup> | 82.16 $\pm$ 7.06                | 95        | 39 |
| <i>timG4/UNipped-ARNAi-6;Udcr2/UGFP</i>   | 26.19 $\pm$ 0.14 <sup>†††</sup>   | 38.42 $\pm$ 4.42 <sup>†††</sup> | 78        | 60 |
| <i>timG4/+;Udcr2/+</i>                    | 24.65 $\pm$ 0.05                  | 69.32 $\pm$ 7.49                | 88        | 41 |

One-way ANOVA,  $P < 0.001$ , Tukey's multiple comparison test, <sup>\*\*\*</sup> $P < 0.001$  when compared with G4 control, <sup>###</sup> $P < 0.001$  when compared with UAS control, <sup>\*\*\*\*</sup> $P < 0.001$  when compared with *pdfG4-Udcr2/UNipped-ARNAi-6* or *timG4/UNipped-ARNAi-6;Udcr2/+*, <sup>†††</sup> $P < 0.001$  when compared with *pdfG4-Udcr2/+;UGFP/+* or *timG4/+;Udcr2/UGFP*. G4, GAL4; U, UAS.

**Appendix Table S4. Related to Figure 3. Genetic interaction between *Nipped-A* and *tim***

| Genotype                                           | Period(hr) $\pm$ SEM                | Power $\pm$ SEM                    | %Rhythmic | N  |
|----------------------------------------------------|-------------------------------------|------------------------------------|-----------|----|
| <i>pdfG4-Udcr2/+;UNipped-ARNAi-5/+</i>             | 25.52 $\pm$ 0.07 <sup>#####</sup>   | 74.65 $\pm$ 6.77 <sup>###</sup>    | 88        | 43 |
| <i>pdfG4-Udcr2/+;UNipped-ARNAi-5/Ptim</i>          | 24.57 $\pm$ 0.17 <sup>++++†††</sup> | 45.21 $\pm$ 5.65 <sup>†††</sup>    | 79        | 34 |
| <i>pdfG4-Udcr2/+;Ptim/+</i>                        | 24.11 $\pm$ 0.06 <sup>#####</sup>   | 108.27 $\pm$ 8.83 <sup>#####</sup> | 100       | 49 |
| <i>pdfG4-Udcr2/+</i>                               | 24.54 $\pm$ 0.04                    | 73.79 $\pm$ 5.41                   | 89        | 66 |
| <i>Ptim/+</i>                                      | 23.42 $\pm$ 0.03                    | 83.45 $\pm$ 7.76                   | 98        | 43 |
| <i>UNipped-ARNAi-5/Ptim</i>                        | 23.54 $\pm$ 0.02                    | 141.09 $\pm$ 7.13                  | 100       | 24 |
| <i>timG4/+;Udcr2/+</i>                             | 23.80 $\pm$ 0.05                    | 111.44 $\pm$ 7.49                  | 93        | 46 |
| <i>timG4/+;Udcr2UNipped-ARNAi-4</i>                | 26.76 $\pm$ 0.12 <sup>#####</sup>   | 62.99 $\pm$ 7.11 <sup>#####</sup>  | 80        | 55 |
| <i>timG4/tim<sup>01</sup>;Udcr2UNipped-ARNAi-4</i> | 26.74 $\pm$ 0.11 <sup>†††</sup>     | 22.86 $\pm$ 4.04 <sup>†††††</sup>  | 46        | 72 |
| <i>timG4/+;Udcr2UNipped-ARNAi-5</i>                | 26.77 $\pm$ 0.11 <sup>#####</sup>   | 62.17 $\pm$ 7.40 <sup>#####</sup>  | 76        | 49 |
| <i>timG4/tim<sup>01</sup>;Udcr2UNipped-ARNAi-5</i> | 26.77 $\pm$ 0.05 <sup>†††</sup>     | 23.49 $\pm$ 4.66 <sup>†††††</sup>  | 43        | 56 |
| <i>timG4/tim<sup>01</sup>;Udcr2/+</i>              | 24.17 $\pm$ 0.03 <sup>**</sup>      | 148.68 $\pm$ 6.89 <sup>**</sup>    | 96        | 53 |
| <i>tim<sup>01</sup>/+</i>                          | 24.08 $\pm$ 0.03                    | 110.34 $\pm$ 6.11                  | 98        | 53 |
| <i>UNipped-ARNAi-4/+</i>                           | 24.00 $\pm$ 0.05                    | 124.97 $\pm$ 6.91                  | 98        | 43 |
| <i>UNipped-ARNAi-5/+</i>                           | 23.82 $\pm$ 0.04                    | 123.58 $\pm$ 5.71                  | 100       | 47 |
| <i>tim<sup>01</sup>/+;UNipped-ARNAi-4/+</i>        | 24.22 $\pm$ 0.05                    | 91.04 $\pm$ 6.53                   | 97        | 39 |
| <i>tim<sup>01</sup>/+;UNipped-ARNAi-5/+</i>        | 24.01 $\pm$ 0.04                    | 96.27 $\pm$ 5.85                   | 98        | 47 |

One-way ANOVA,  $P < 0.001$ . Tukey's multiple comparison test, <sup>\*\*\*</sup> $P < 0.001$  when compared with G4 control; <sup>###</sup> $P < 0.001$  when compared with *Ptim* or *tim<sup>01</sup>*, <sup>†††</sup> $P < 0.001$  when compared with *pdfG4-Udcr2/+;UNipped-ARNAi-5/+* or

*timG4/+;Udcr2UNipped-ARNAi*, <sup>†††</sup> $P < 0.001$  when compared with *pdfG4-Udcr2/+;Ptim/+* or *timG4/tim<sup>01</sup>;Udcr2/+*. G4, GAL4; U, UAS.

Appendix Table S5. Genetic interaction between *Nipped-A* and *Pdp1ε*

| Genotype                                                  | Period(hr) $\pm$ SEM               | Power $\pm$ SEM                    | %Rhythmic | N   |
|-----------------------------------------------------------|------------------------------------|------------------------------------|-----------|-----|
| <i>pdfG4-Udcr2/UNipped-ARNAi-4/+</i>                      | 25.65 $\pm$ 0.10 <sup>#####</sup>  | 59.95 $\pm$ 6.55 <sup>###</sup>    | 85        | 54  |
| <i>pdfG4-Udcr2/UPdp1ε; UNipped-ARNAi-4/+</i>              | 23.50 $\pm$ 0.11 <sup>+++†††</sup> | 26.69 $\pm$ 2.88 <sup>+++†</sup>   | 58        | 106 |
| <i>pdfG4-Udcr2/UPdp1ε</i>                                 | 24.16 $\pm$ 0.05 <sup>#####</sup>  | 46.95 $\pm$ 4.43 <sup>#####</sup>  | 73        | 93  |
| <i>pdfG4-Udcr2/+</i>                                      | 24.54 $\pm$ 0.04                   | 73.79 $\pm$ 5.41                   | 89        | 66  |
| <i>UPdp1ε/+</i>                                           | 23.57 $\pm$ 0.02                   | 103.79 $\pm$ 5.30                  | 97        | 75  |
| <i>UNipped-ARNAi-4/+</i>                                  | 23.92 $\pm$ 0.03                   | 115.44 $\pm$ 4.48                  | 97        | 76  |
| <i>UPdp1ε/+; UNipped-ARNAi-4/+</i>                        | 23.75 $\pm$ 0.05                   | 96.05 $\pm$ 5.88                   | 100       | 44  |
| <i>Udcr2/UNipped-ARNAi-6;cryG4-16/+</i>                   | 26.53 $\pm$ 0.08 <sup>#####</sup>  | 102.5 $\pm$ 6.67                   | 95        | 68  |
| <i>Udcr2/+;cryG4-16/Pdp1<sup>3135</sup></i>               | 25.76 $\pm$ 0.09 <sup>###</sup>    | 79.3 $\pm$ 5.47                    | 96        | 59  |
| <i>Udcr2/UNipped-ARNAi-6;cryG4-16/Pdp1<sup>3135</sup></i> | 28.42 $\pm$ 0.19 <sup>+++†††</sup> | 39.84 $\pm$ 3.84 <sup>+++†††</sup> | 82        | 79  |
| <i>Udcr2/+;cryG4-16/+</i>                                 | 25.59 $\pm$ 0.15                   | 94.36 $\pm$ 6.21                   | 100       | 56  |
| <i>UNipped-ARNAi-6/+</i>                                  | 23.68 $\pm$ 0.04                   | 108.01 $\pm$ 6.81                  | 100       | 40  |
| <i>Pdp1<sup>3135</sup>/+</i>                              | 23.79 $\pm$ 0.05                   | 66.38 $\pm$ 5.21                   | 90        | 61  |
| <i>UNipped-ARNAi-6/+;Pdp1<sup>3135</sup>/+</i>            | 23.75 $\pm$ 0.05                   | 79.95 $\pm$ 4.85                   | 97        | 46  |

One-way ANOVA,  $P < 0.001$ , Tukey's multiple comparison test, <sup>\*\*\*</sup> $P < 0.001$  when compared with G4 control, <sup>###</sup> $P < 0.001$  when compared with UAS control, <sup>+++</sup> $P < 0.001$  when compared with *pdfG4-Udcr2/UNipped-ARNAi-4/+* or *Udcr2/UNipped-ARNAi-6;cryG4-16/+*, <sup>†††</sup> $P < 0.001$  when compared with *pdfG4-Udcr2/UPdp1ε* or *Udcr2/+;cryG4-16/Pdp1<sup>3135</sup>*. G4, GAL4; U, UAS.

Appendix Table S6. Genetic interaction between *Nipped-A* and *per*

| Genotype                                                | Period(hr) $\pm$ SEM               | Power $\pm$ SEM                   | %Rhythmic | N  |
|---------------------------------------------------------|------------------------------------|-----------------------------------|-----------|----|
| <i>pdfG4-Udcr2/UNipped-ARNAi-6</i>                      | 25.78 $\pm$ 0.13 <sup>#####</sup>  | 48.62 $\pm$ 5.11 <sup>#####</sup> | 82        | 61 |
| <i>pdfG4-Udcr2/+;Uper/+</i>                             | 23.83 $\pm$ 0.21*                  | 4.92 $\pm$ 1.68 <sup>#####</sup>  | 13        | 46 |
| <i>pdfG4-Udcr2/UNipped-ARNAi-6;Uper/+</i>               | 23.73 $\pm$ 0.11 <sup>+++</sup>    | 11.65 $\pm$ 2.42 <sup>+++</sup>   | 31        | 60 |
| <i>pdfG4-Udcr2/+</i>                                    | 24.54 $\pm$ 0.04                   | 73.79 $\pm$ 5.41                  | 89        | 66 |
| <i>UNipped-ARNAi-6/+</i>                                | 23.68 $\pm$ 0.04                   | 108.01 $\pm$ 6.81                 | 100       | 40 |
| <i>Uper/+</i>                                           | 23.74 $\pm$ 0.05                   | 61.82 $\pm$ 5.74                  | 95        | 46 |
| <i>UNipped-ARNAi-6/+;Uper/+</i>                         | 23.71 $\pm$ 0.04                   | 79.63 $\pm$ 4.92                  | 97        | 46 |
| <i>Udcr2/UNipped-ARNAi-6;cryG4-16/+</i>                 | 26.53 $\pm$ 0.08 <sup>#####</sup>  | 102.50 $\pm$ 6.67                 | 95        | 68 |
| <i>per<sup>L</sup>;Udcr2/+;cryG4-16/+</i>               | 30.59 $\pm$ 0.19 <sup>#####</sup>  | 83.51 $\pm$ 7.64                  | 93        | 44 |
| <i>per<sup>L</sup>;Udcr2/UNipped-ARNAi-6;cryG4-16/+</i> | 32.93 $\pm$ 0.16 <sup>++++††</sup> | 68.49 $\pm$ 5.85 <sup>+++</sup>   | 85        | 71 |
| <i>per<sup>L</sup></i>                                  | 29.16 $\pm$ 0.06                   | 72.48 $\pm$ 5.72                  | 91        | 45 |
| <i>per<sup>L</sup>;UNipped-ARNAi-6/+</i>                | 29.38 $\pm$ 0.07                   | 94.60 $\pm$ 7.69                  | 97        | 40 |
| <i>Udcr2/+;cryG4-16/+</i>                               | 25.58 $\pm$ 0.14                   | 94.36 $\pm$ 6.21                  | 100       | 56 |
| <i>UNipped-ARNAi-6/+</i>                                | 23.68 $\pm$ 0.04                   | 108.00 $\pm$ 6.80                 | 100       | 40 |

One-way ANOVA,  $P < 0.001$ . Tukey's multiple comparison test, <sup>\*\*\*</sup> $P < 0.001$  when compared with G4 control, <sup>###</sup> $P < 0.001$  when compared with UAS control, <sup>+++</sup> $P < 0.001$  when compared with *pdfG4-Udcr2/UNipped-ARNAi-6* or *Udcr2/UNipped-ARNAi-6;cryG4-16/+*, <sup>†††</sup> $P < 0.001$  when compared with *per<sup>L</sup>;Udcr2/+;cryG4-16/+*. G4, GAL4; U, UAS.



**Appendix Table S7. Genetic interaction between *Nipped-A* and *clk***

| Genotype                                 | Period(hr) $\pm$ SEM               | Power $\pm$ SEM                 | %Rhythmic | N  |
|------------------------------------------|------------------------------------|---------------------------------|-----------|----|
| <i>pdfG4-Udcr2/+;UNipped-ARNAi-4/+</i>   | 25.78 $\pm$ 0.07 <sup>***###</sup> | 73.08 $\pm$ 6.77 <sup>###</sup> | 85        | 49 |
| <i>pdfG4-Udcr2/+;Uclk/+</i>              | 22.83 $\pm$ 0.06 <sup>***###</sup> | 61.21 $\pm$ 6.06                | 92        | 57 |
| <i>pdfG4-Udcr2/+;UNipped-ARNAi-4Uclk</i> | 23.86 $\pm$ 0.06 <sup>+++†††</sup> | 74.12 $\pm$ 5.88                | 91        | 61 |
| <i>pdfG4-Udcr2/+</i>                     | 24.31 $\pm$ 0.04                   | 84.29 $\pm$ 7.29                | 87        | 47 |
| <i>UNipped-ARNAi-4/+</i>                 | 23.88 $\pm$ 0.05                   | 114.65 $\pm$ 5.63               | 98        | 47 |
| <i>Uclk/+</i>                            | 23.80 $\pm$ 0.05                   | 73.08 $\pm$ 5.46                | 96        | 32 |
| <i>UNipped-ARNAi-4Uclk</i>               | 23.97 $\pm$ 0.03                   | 130.51 $\pm$ 4.47               | 100       | 62 |

One-way ANOVA,  $P < 0.001$ , Tukey's multiple comparison test, <sup>\*\*\*</sup> $P < 0.001$  when compared with G4 control, <sup>###</sup> $P < 0.001$  when compared with UAS control, <sup>+++</sup> $P < 0.001$  when compared with *pdfG4-Udcr2/+;UNipped-ARNAi-4/+*, <sup>†††</sup> $P < 0.001$  when compared with *pdfG4-Udcr2/+;Uclk/+*. G4, GAL4; U, UAS.

**Appendix Table S8. Knocking down *not* reduces the power of locomotor rhythm**

| Genotype                           | Period(hr) $\pm$ SEM               | Power $\pm$ SEM                    | %Rhythmic | N   |
|------------------------------------|------------------------------------|------------------------------------|-----------|-----|
| <i>UnotRNAi-1/+</i>                | 23.37 $\pm$ 0.03                   | 54.44 $\pm$ 5.31                   | 78        | 89  |
| <i>UnotRNAi-2/+</i>                | 23.54 $\pm$ 0.05                   | 115.44 $\pm$ 6.31                  | 100       | 47  |
| <i>timG4/+;Udcr2/+</i>             | 24.02 $\pm$ 0.04                   | 77.33 $\pm$ 3.45                   | 97        | 134 |
| <i>Udcr2/+;cryG4-16/+</i>          | 25.37 $\pm$ 0.04                   | 126.94 $\pm$ 3.38                  | 100       | 183 |
| <i>pdfG4-Udcr2/+</i>               | 24.36 $\pm$ 0.02                   | 104.17 $\pm$ 3.81                  | 96        | 123 |
| <i>timG4/+;Udcr2/UnotRNAi-1</i>    | N/A                                | 1.77 $\pm$ 0.50 <sup>***###</sup>  | 0         | 94  |
| <i>timG4/UnotRNAi-2;Udcr2/+</i>    | Lethal                             | Lethal                             | Lethal    | 0   |
| <i>Udcr2/+;cryG4-16/UnotRNAi-1</i> | 26.16 $\pm$ 0.09 <sup>***###</sup> | 16.51 $\pm$ 1.82 <sup>***###</sup> | 42        | 150 |
| <i>Udcr2/UnotRNAi-2;cryG4-16/+</i> | 23.72 $\pm$ 0.2 <sup>**</sup>      | 20.82 $\pm$ 4.41 <sup>***###</sup> | 53        | 30  |
| <i>pdfG4-Udcr2/+;UnotRNAi-1/+</i>  | 24.74 $\pm$ 0.08 <sup>***###</sup> | 33.04 $\pm$ 3.05 <sup>***###</sup> | 66        | 112 |
| <i>pdfG4-Udcr2/UnotRNAi-2</i>      | 24.44 $\pm$ 0.07 <sup>###</sup>    | 102.35 $\pm$ 9.01                  | 94        | 35  |

One-way ANOVA,  $P < 0.001$ , Tukey's multiple comparison test, <sup>\*\*\*</sup> $P < 0.001$  when compared with G4 and *Udcr2*, <sup>##</sup> $P < 0.01$ ,

<sup>###</sup> $P < 0.001$  when compared with *URNAi*. G4, GAL4; U, UAS.

Appendix Table S9. Genetic interaction between *Nipped-A* and *not*

| Genotype                                                                                            | Period(hr) $\pm$ SEM               | Power $\pm$ SEM                   | %Rhythmic | N   |
|-----------------------------------------------------------------------------------------------------|------------------------------------|-----------------------------------|-----------|-----|
| <i>Unot</i> <sup>+</sup> / <sub>+</sub>                                                             | 23.58 $\pm$ 0.04                   | 95.70 $\pm$ 5.88                  | 100       | 46  |
| <i>UNipped-ARNAi-4</i> <sup>+</sup> / <sub>+</sub>                                                  | 23.88 $\pm$ 0.04                   | 119.37 $\pm$ 5.58                 | 98        | 45  |
| <i>pdfG4-Udcr2</i> <sup>+</sup> / <sub>+</sub> ; <i>Unot</i> <sup>+</sup> / <sub>+</sub>            | 24.06 $\pm$ 0.05 <sup>####</sup>   | 87.93 $\pm$ 5.36                  | 97        | 59  |
| <i>pdfG4-Udcr2</i> <sup>+</sup> / <sub>+</sub> ; <i>UNipped-ARNAi-4</i> <sup>+</sup> / <sub>+</sub> | 25.66 $\pm$ 0.07 <sup>#####</sup>  | 103.14 $\pm$ 7.01                 | 97        | 35  |
| <i>pdfG4-Udcr2</i> <sup>+</sup> / <sub>+</sub> ; <i>UNipped-ARNAi-4</i> <i>Unot</i>                 | 24.82 $\pm$ 0.03 <sup>+++†††</sup> | 133.26 $\pm$ 4.68 <sup>†††</sup>  | 99        | 73  |
| <i>UNipped-ARNAi-6</i> <sup>+</sup> / <sub>+</sub> ; <i>Unot</i> <sup>+</sup> / <sub>+</sub>        | 23.55 $\pm$ 0.03                   | 118.16 $\pm$ 9.82                 | 97        | 32  |
| <i>timG4</i> <sup>+</sup> / <sub>+</sub> ; <i>Udcr2</i> <sup>+</sup> / <sub>+</sub>                 | 24.65 $\pm$ 0.05                   | 69.32 $\pm$ 7.49                  | 88        | 41  |
| <i>timG4</i> <sup>+</sup> / <sub>+</sub> ; <i>Udcr2</i> <i>Unot</i>                                 | 23.72 $\pm$ 0.06 <sup>***</sup>    | 92.48 $\pm$ 7.63                  | 100       | 39  |
| <i>timG4</i> / <i>UNipped-ARNAi-6</i> ; <i>Udcr2</i> <sup>+</sup> / <sub>+</sub>                    | 25.95 $\pm$ 0.11 <sup>#####</sup>  | 49.88 $\pm$ 6.71 <sup>###</sup>   | 86        | 37  |
| <i>timG4</i> / <i>UNipped-ARNAi-6</i> ; <i>Udcr2</i> <i>Unot</i>                                    | 24.91 $\pm$ 0.10 <sup>+++†††</sup> | 46.36 $\pm$ 6.28 <sup>†††</sup>   | 85        | 40  |
| <i>UnotRNAi-1</i> <sup>+</sup> / <sub>+</sub>                                                       | 23.37 $\pm$ 0.03                   | 54.44 $\pm$ 5.31                  | 78        | 89  |
| <i>UNipped-ARNAi-6</i> <sup>+</sup> / <sub>+</sub>                                                  | 23.64 $\pm$ 0.05                   | 111.55 $\pm$ 7.61                 | 97        | 39  |
| <i>UNipped-ARNAi-6</i> <i>UnotRNAi-1</i>                                                            | 23.50 $\pm$ 0.02                   | 77.34 $\pm$ 7.19                  | 89        | 46  |
| <i>pdfG4-Udcr2</i> <sup>+</sup> / <sub>+</sub>                                                      | 24.44 $\pm$ 0.05                   | 100.70 $\pm$ 6.07                 | 98        | 55  |
| <i>pdfG4-Udcr2</i> <sup>+</sup> / <sub>+</sub> ; <i>UnotRNAi-1</i> <sup>+</sup> / <sub>+</sub>      | 24.74 $\pm$ 0.08 <sup>###</sup>    | 33.04 $\pm$ 3.05 <sup>#####</sup> | 66        | 112 |
| <i>pdfG4-Udcr2</i> / <i>UNipped-ARNAi-6</i>                                                         | 25.45 $\pm$ 0.10 <sup>#####</sup>  | 79.68 $\pm$ 8.66 <sup>##</sup>    | 91        | 36  |
| <i>pdfG4-Udcr2</i> / <i>UNipped-ARNAi-6</i> ; <i>UnotRNAi-1</i> <sup>+</sup> / <sub>+</sub>         | 26.60 $\pm$ 0.17 <sup>+++†††</sup> | 22.57 $\pm$ 3.93 <sup>+++</sup>   | 69        | 32  |

One-way ANOVA,  $P < 0.001$ , Tukey's multiple comparison test,  $***P < 0.001$  when compared with G4 control,  $####P < 0.001$  when compared with UAS control,  $+++P < 0.001$  when compared with *pdfG4-Udcr2*<sup>+</sup>/<sub>+</sub>;*UNipped-ARNAi-4*<sup>+</sup>/<sub>+</sub>, *timG4*/*UNipped-ARNAi-6*;*Udcr2*<sup>+</sup>/<sub>+</sub> or *pdfG4-Udcr2*/*UNipped-ARNAi-6*,  $†††p < 0.001$  when compared with *pdfG4-Udcr2*<sup>+</sup>/<sub>+</sub>;*Unot*<sup>+</sup>/<sub>+</sub>, *timG4*<sup>+</sup>/<sub>+</sub>;*Udcr2**Unot* or *pdfG4-Udcr2*<sup>+</sup>/<sub>+</sub>;*UnotRNAi-1*<sup>+</sup>/<sub>+</sub>. G4, GAL4; U, UAS.

**Appendix Table S10. Knocking down *Sgf11* reduces the power of locomotor rhythm**

| Genotype                             | Period(hr) $\pm$ SEM            | Power $\pm$ SEM                   | %Rhythmic | N  |
|--------------------------------------|---------------------------------|-----------------------------------|-----------|----|
| <i>USgf11RNAi-1/+</i>                | 23.47 $\pm$ 0.03                | 68.56 $\pm$ 4.00                  | 97        | 69 |
| <i>USgf11RNAi-2/+</i>                | 23.65 $\pm$ 0.04                | 104.73 $\pm$ 7.74                 | 95        | 42 |
| <i>timG4/+;Udcr2/+</i>               | 24.47 $\pm$ 0.05                | 78.66 $\pm$ 7.36                  | 100       | 38 |
| <i>Udcr2/+;cryG4-16/+</i>            | 25.36 $\pm$ 0.09                | 121.32 $\pm$ 6.21                 | 98        | 43 |
| <i>pdfG4-Udcr2/+</i>                 | 24.50 $\pm$ 0.04                | 116.80 $\pm$ 7.84                 | 97        | 32 |
| <i>timG4/USgf11RNAi-1;Udcr2/+</i>    | 24.86 $\pm$ 0.18 <sup>###</sup> | 6.33 $\pm$ 1.33 <sup>#####</sup>  | 18        | 79 |
| <i>timG4/USgf11RNAi-2;Udcr2/+</i>    | 24.81 $\pm$ 0.06 <sup>###</sup> | 44.44 $\pm$ 5.60 <sup>#####</sup> | 70        | 61 |
| <i>Udcr2/USgf11RNAi-1;cryG4-16/+</i> | 25.21 $\pm$ 0.07 <sup>###</sup> | 78.48 $\pm$ 6.33 <sup>***</sup>   | 91        | 46 |
| <i>Udcr2/USgf11RNAi-2;cryG4-16/+</i> | 25.29 $\pm$ 0.14 <sup>###</sup> | 110.66 $\pm$ 9.90                 | 97        | 30 |
| <i>pdfG4-Udcr2/USgf11RNAi-1</i>      | 24.61 $\pm$ 0.17 <sup>###</sup> | 35.16 $\pm$ 4.44 <sup>#####</sup> | 77        | 30 |
| <i>pdfG4-Udcr2/USgf11RNAi-2</i>      | 24.55 $\pm$ 0.08 <sup>###</sup> | 94.83 $\pm$ 9.26                  | 97        | 30 |

One-way ANOVA,  $P < 0.001$ , Tukey's multiple comparison test, \* $P < 0.05$ , \*\* $P < 0.01$ , \*\*\* $P < 0.001$  when compared with G4 and *Udcr2*; ## $P < 0.01$ , ### $P < 0.001$  when compared with *URNAi*. G4, GAL4; U, UAS.

**Appendix Table S11. Genetic interaction between *Nipped-A* and *Sgf11***

| Genotype                                              | Period(hr) $\pm$ SEM                | Power $\pm$ SEM                  | %Rhythmic | N  |
|-------------------------------------------------------|-------------------------------------|----------------------------------|-----------|----|
| USgf11RNAi-1/+                                        | 23.47 $\pm$ 0.03                    | 68.56 $\pm$ 4.00                 | 97        | 69 |
| UNipped-ARNAi-4/+                                     | 23.80 $\pm$ 0.05                    | 103.70 $\pm$ 7.75                | 97        | 34 |
| USgf11RNAi-1/+;UNipped-ARNAi-4/+                      | 23.68 $\pm$ 0.06                    | 96.65 $\pm$ 6.71                 | 98        | 42 |
| pdfG4-Udcr2/+                                         | 24.38 $\pm$ 0.05                    | 100.63 $\pm$ 6.15                | 98        | 45 |
| pdfG4-Udcr2/Usgf11RNAi-1                              | 24.61 $\pm$ 0.17 <sup>###</sup>     | 35.16 $\pm$ 4.44 <sup>####</sup> | 77        | 30 |
| pdfG4-Udcr2/+;UNipped-ARNAi-4/+                       | 25.62 $\pm$ 0.08 <sup>####</sup>    | 93.19 $\pm$ 6.15                 | 96        | 69 |
| pdfG4-Udcr2/Usgf11RNAi-1;UNipped-ARNAi-4/+            | 26.59 $\pm$ 0.10 <sup>++++††</sup>  | 36.54 $\pm$ 4.23 <sup>+++</sup>  | 76        | 42 |
| Sgf11 <sup>e01308</sup> /+                            | 23.73 $\pm$ 0.05                    | 93.68 $\pm$ 8.43                 | 97        | 36 |
| UNipped-ARNAi-4/Sgf11 <sup>e01308</sup>               | 24.10 $\pm$ 0.08                    | 127.98 $\pm$ 9.89                | 93        | 27 |
| pdfG4-Udcr2/+;Sgf11 <sup>e01308</sup> /+              | 24.69 $\pm$ 0.05 <sup>####</sup>    | 130.40 $\pm$ 8.02 <sup>###</sup> | 100       | 35 |
| pdfG4-Udcr2/+;UNipped-ARNAi-4/Sgf11 <sup>e01308</sup> | 26.58 $\pm$ 0.07 <sup>++++†††</sup> | 80.19 $\pm$ 4.43 <sup>†††</sup>  | 96        | 68 |

One-way ANOVA,  $P < 0.001$ , Tukey's multiple comparison test, <sup>###</sup>  $P < 0.001$  when compared with G4 and Udcr2, <sup>####</sup>  $P < 0.001$  when compared with USgf11RNAi-1/+ or Sgf11<sup>e01308</sup>/+, <sup>+++</sup>  $P < 0.001$  when compared with pdfG4-Udcr2/+;UNipped-ARNAi-4/+, <sup>†††</sup>  $P < 0.001$  when compared with pdfG4-Udcr2/Usgf11RNAi-1 or pdfG4-Udcr2/+;Sgf11<sup>e01308</sup>/+. G4, GAL4; U, UAS.

**Appendix Table S12. Oligonucleotides used in this study**

| <b>Genes</b>       | <b>Sense (5'-3')</b>     | <b>Antisense (5'-3')</b> | <b>Source</b>           |
|--------------------|--------------------------|--------------------------|-------------------------|
| <i>si-Nipped-A</i> | GCGUGUAAAUUGCCCAUAATT    | UUAUGGGCAAUUUACACGCTT    | This paper              |
| <i>Nipped-A</i>    | CGCGAAAAACATAAAACTGC     | GGAATGTTTCCGTGACTTGC     | This paper              |
| <i>tim</i>         | CTGGGGAGTGACCATGG        | GCTGGAATCGCCACTG         | This paper              |
| <i>per</i>         | CAGCAGCAGCCTAATCG        | GAGTCGGACACCTTGG         | This paper              |
| <i>clk</i>         | TACTGCGTGAGGATATCG       | GTTGTTGTTCTGGTTGC        | This paper              |
| <i>cyc</i>         | GAGGTCTTCGTGCGAAAGG      | AAAGCACATGGGAATCATGG     | This paper              |
| <i>Pdp1ε</i>       | GAACCCAAGTGTAAGACAATGC   | CTGGAAATACTGCGACAATGTG   | This paper              |
|                    | G                        | G                        |                         |
| <i>vri</i>         | TGTTTTTTGCCGCTTCGGTCA    | TTACGACACCAAACGATCGA     | This paper              |
| <i>cry</i>         | TGCAGGTACCAAGAATGTGG     | GGAAGATATAAGCCGTTCCG     | This paper              |
| <i>not</i>         | CCACTTGCTTCATGAACTGC     | ACATTTGTGCGATGACTTGC     | This paper              |
| <i>sgf11</i>       | TGCACTCTTCGGGAAATACC     | TTTGCCATTGTTCTTCTTGG     | This paper              |
| <i>actin</i>       | CTAACCTCGCCCTCTCCTCT     | GCAGCCAAGTGTGAGTGTGT     | This paper              |
| <i>rp49</i>        | TACAGGCCCAAGATCGTGAA     | GCACTCTGTTGTCGATACCC     | This paper              |
| <i>pre-tim</i>     | ACTGCTTTCCAATGCGGTATG    | AAGCCTCCGAAAAACATATGAA   | (Andreazza              |
|                    |                          | AA                       | , Bouleau et al., 2015) |
| <i>pre-pdp1</i>    | GGCCGAGTCAAGTGAGTATAGC   | CATGTGATCATGGTTTGTTTTAC  | This paper              |
|                    |                          | G                        |                         |
| <i>cbp20</i>       | AGATCCACGAGCTCTTCTCC     | CCGATCGGACATAGTACTCC     | This paper              |
| <i>tim-E box</i>   | ACACTGACCGAAACACCCACTC   | GCGGCACGTTGTGATTACACG    | (Zhou, Yu et al., 2016) |
| <i>tim-Tss</i>     | TGCTATTGAAGTTGCATTTTACAT | TCGTGTTATAGTTTCAGTGCTG   | This paper              |
|                    | AAGCCAACAACG             | TTATATACTGATG            |                         |
| <i>timbody</i>     | GAGGAGCTGGCCCTTATAACC    | ATCGAGTTGCAGTGCTTCG      | This paper              |
| <i>Ppd1ε E-box</i> | GCACTCTCATTCTCTCTGTGC    | ACGCGGATTTCAATATGACC     | (Zhou et al., 2016)     |
| <i>Ppd1ε TSS</i>   | TTTCAGTTACGCGTTGTTGC     | ACCTCGCACGGATAAGTCC      | This paper              |
| <i>Ppd1ε body</i>  | GCAACTGGTAATGGAAATGGTG   | CTGTTCAAATGGTTGTGATGCT   | This paper              |
|                    |                          | C                        |                         |

---

**Appendix Table S13. Antibodies used in this study**

| Antibodies                                   | Source                                                | Identifier                      |
|----------------------------------------------|-------------------------------------------------------|---------------------------------|
| Rat anti-TIM                                 | Joanna C. Chiu,<br>University of California,<br>Davis | N/A                             |
| Guinea pig anti-PER                          | Joanna C. Chiu,<br>University of California,<br>Davis | N/A                             |
| Guinea pig anti-PDP1ε                        | Paul E. Hardin, Texas A&<br>M University              | N/A                             |
| Rabbit anti-Nipped-A                         | Sigma                                                 | Cat#PLA0167, RRID:AB_2209668    |
| Mouse anti-HSP70                             | Sigma                                                 | Cat# SAB4200714                 |
| Rabbit anti-acetyl-Histone H3                | Millipore                                             | Cat#06-599,RRID: AB_2115283     |
| Rabbit anti-Histone H3 (acetyl K9)           | Abcam                                                 | Cat#ab4441, RRID:AB_2118292     |
| Rabbit anti-acetyl-Histone H3<br>(Lys14)     | Millipore                                             | Cat#07-353, RRID:AB_310545      |
| Rabbit anti-HistoneH3 (acetyl K27)           | Abcam                                                 | Cat#ab4729, RRID:AB_2118291     |
| Mouse anti-Ubiquityl-Histone H2B,<br>clone56 | Millipore                                             | Cat#05-1312-I,RRID:AB_1587119   |
| Rabbit anti-acetyl-Histone H4                | Millipore                                             | Cat#06-866,RRID:AB_310270       |
| Rabbit anti-acetyl-Histone H4<br>(Lys16)     | Millipore                                             | Cat#07-329, RRID:AB_310525      |
| Normal mouse IgG                             | Santa Cruz Biotechnology                              | Cat#sc-2025, RRID:AB_737182     |
| Normal rabbit IgG                            | Santa Cruz Biotechnology                              | Cat#sc-2027, RRID:AB_737197     |
| Donkey anti-mouse Alexa Fluor<br>488 nm      | Molecular Probes                                      | Cat#R37114, RRID:AB_2556542     |
| Donkey anti-mouse Alexa Fluor<br>594 nm      | Molecular Probes                                      | Cat#R37115,RRID:AB_2556543      |
| Donkey anti-rabbit Alexa Fluor 488<br>nm     | Abcam                                                 | Cat#ab150073,RRID:AB_2636877    |
| Donkey anti-rat Alexa Fluor 488<br>nm        | Abcam                                                 | Cat#ab150153,RRID:AB_2737355    |
| Donkey anti-Guinea pig Alexa<br>Fluor 594 nm | Jackson<br>ImmunoResearch Labs                        | Cat#706-585-148,RRID:AB_2340474 |

---

---

## Supplemental References

Andreazza S, Bouleau S, Martin B, Lamouroux A, Ponien P, Papin C, Chelot E, Jacquet E, Rouyer F (2015) Daytime CLOCK Dephosphorylation Is Controlled by STRIPAK Complexes in Drosophila. *Cell Rep* 11: 1266-79

Zhou J, Yu W, Hardin PE (2016) CLOCKWORK ORANGE Enhances PERIOD Mediated Rhythms in Transcriptional Repression by Antagonizing E-box Binding by CLOCK-CYCLE. *PLoS Genet* 12: e1006430



## Supplemental Figures

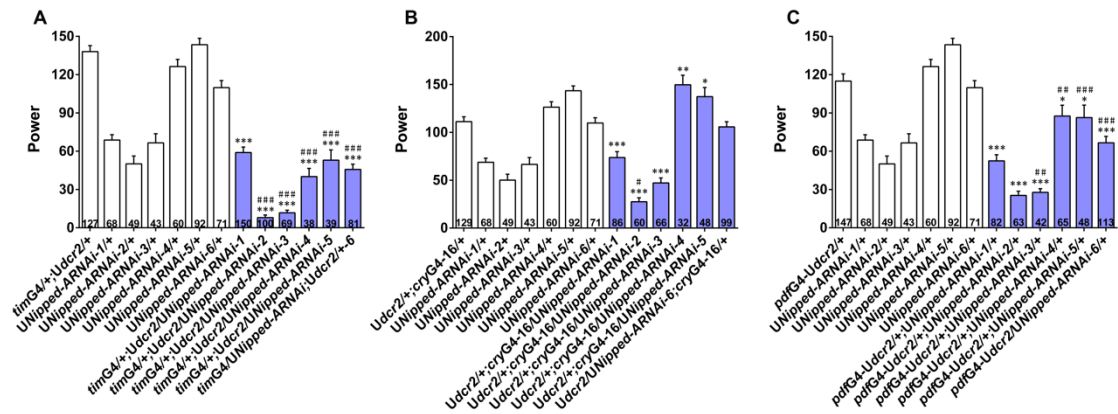

**Appendix Figure S1. Knocking down *Nipped-A* reduces the power of locomotor rhythms.**

A-C The power of DD locomotor rhythms of flies with *Nipped-A* knocked down and controls.

Data information: Digits on the bars are the number of flies tested. Statistical difference is measured using one-way ANOVA,  $P < 0.001$ , Tukey's multiple comparison test, \*/#  $P < 0.05$ , \*\*/##  $P < 0.01$ , \*\*\*/###  $P < 0.001$ . Error bars represent SEM. \* compared with the GAL4 controls; # compared with the UAS controls. G4, GAL4; U, UAS.

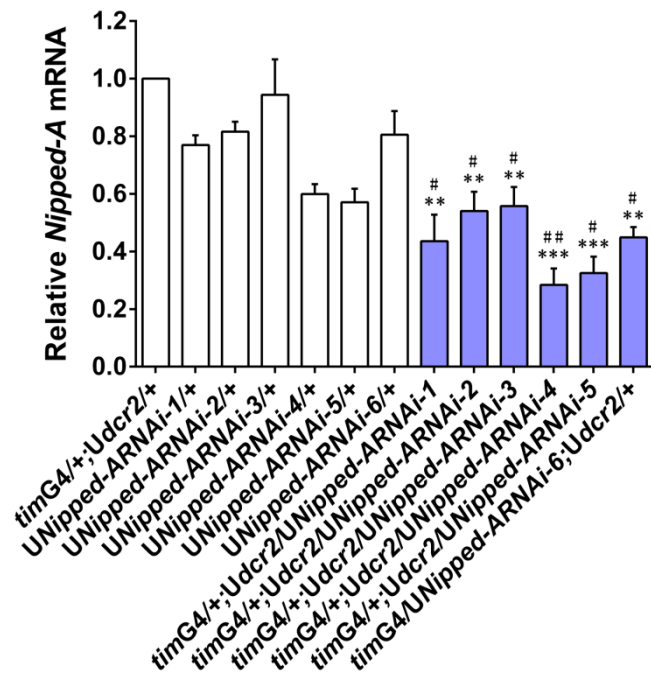

**Appendix Figure S2. Validation of the knock down effects of *Nipped-A* RNAi flies.**

Plots of relative mRNA abundance of *Nipped-A* in whole head extracts of flies with *Nipped-A* knocked down and controls determined by qRT-PCR ( $n \geq 3$ ).

Data information: Student's *t* test, \*/#  $P < 0.05$ , \*\*/##  $P < 0.01$ , \*\*\*/###  $P < 0.001$ . Error bars represent SEM. \* compared with the GAL4 controls; # compared with the UAS controls. G4, GAL4; U, UAS.

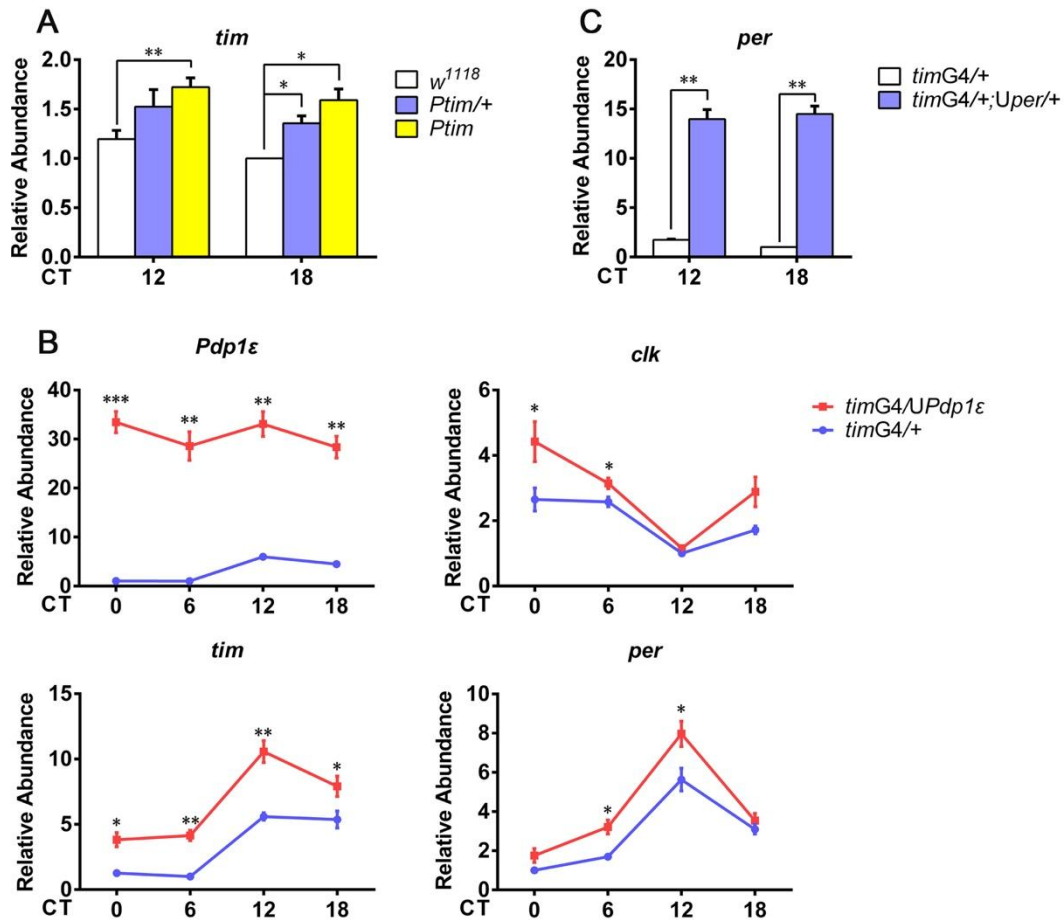

**Appendix Figure S3. Validation of the over-expression effects of *tim*, *Pdp1ε* and *per*.**

A Plots of relative mRNA abundance of *tim* in whole head extracts of *w<sup>1118</sup>*, *Ptim/+* and *Ptim* flies determined by qRT-PCR ( $n=4$ ).

B Plots of relative mRNA abundance of *Pdp1ε*, *clk*, *tim* and *per* in whole head extracts of flies with *Pdp1ε* over expression and controls determined by qRT-PCR ( $n=4$ ).

C Plots of relative mRNA abundance of *per* in whole head extracts of flies with *per* over expression and controls determined by qRT-PCR ( $n=3$ ).

Data information: Student's *t* test, \* $P<0.05$ , \*\* $P<0.01$ , \*\*\* $P<0.001$ . Error bars represent SEM.

\* compared with *timG4/+* or *w<sup>1118</sup>* control.

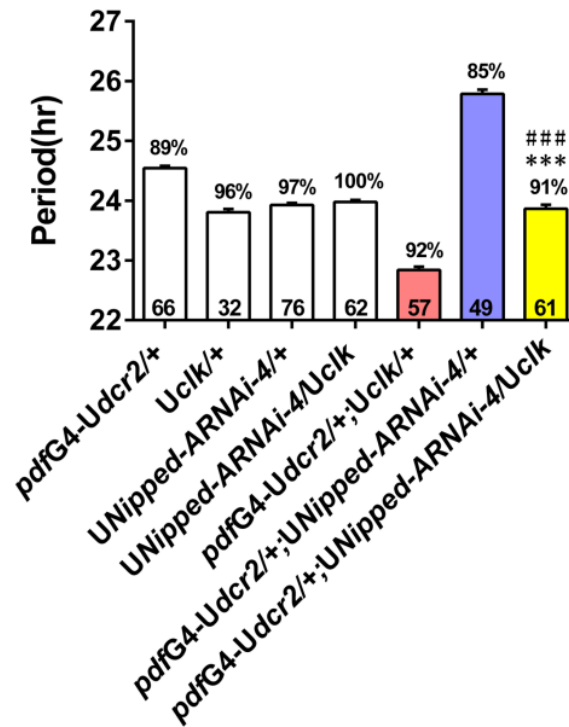

**Appendix Figure S4. *Nipped-A* does not appear to genetically interact with *clk*.**

The period of DD locomotor rhythm of *Nipped-A* RNAi flies over-expressing *clk*.

Data information: Digits on the bars are the number of flies tested. Percentage of rhythmicity is indicated above the bars. Statistical difference is measured using one-way ANOVA,  $P < 0.001$ , Tukey's multiple comparison test,  $^{***}/^{###} P < 0.001$ , \* compared with the *Nipped-A* RNAi flies, # compared with the over-expression flies. Error bars represent SEM. G4, GAL4; U, UAS.

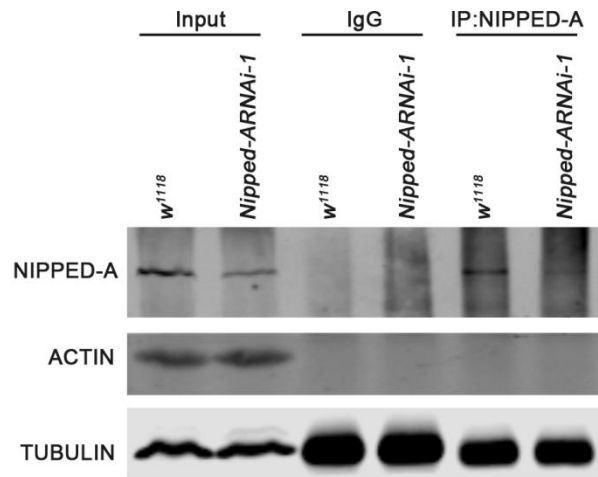

**Appendix Figure S5. Validating the specificity of the NIPPED-A antibody.**

NIPPED-A was immunoprecipitated from whole head extracts of *Nipped-A* RNAi (*timG4/+;Udcr2/UNipped-A RNAi-1*) and control (*w<sup>1118</sup>*) flies collected at CT12 and detected in the protein input control and immunoprecipitates by Western blotting.

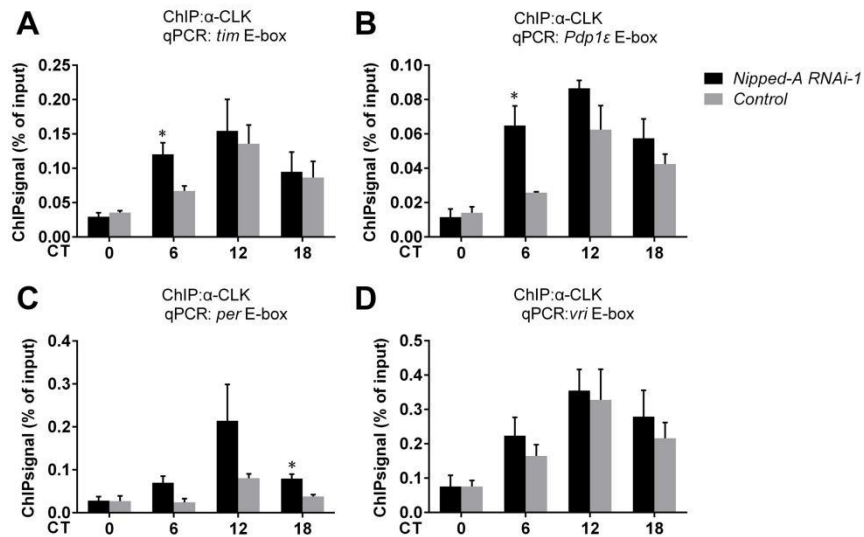

**Appendix Figure S6. Knocking down Nipped-A enhances CLK binding at *Pdp1ε* and *per* promoters.**

A-D ChIP assays to detect CLK binding at E-box elements in *tim* (A), *Pdp1ε* (B), *per* (C) and *vri* (D) promoters of *Nipped-A RNAi* (*timG4/+;Udcr2/U Nipped-ARNAi-1*) and control (*timG4/+;Udcr2/+*) flies.

Data information: Error bars represent SEM (n=3). Statistical difference for CLK binding at *tim*, *Pdp1ε* and *per* promoters throughout the time course is measured using one-way ANOVA,  $P < 0.05$ . Significant effect of genotype is found for *Pdp1ε* ( $P < 0.01$ ) and *per* ( $P < 0.05$ ), using two-way ANOVA. Student's *t* test, \* $P < 0.05$ .

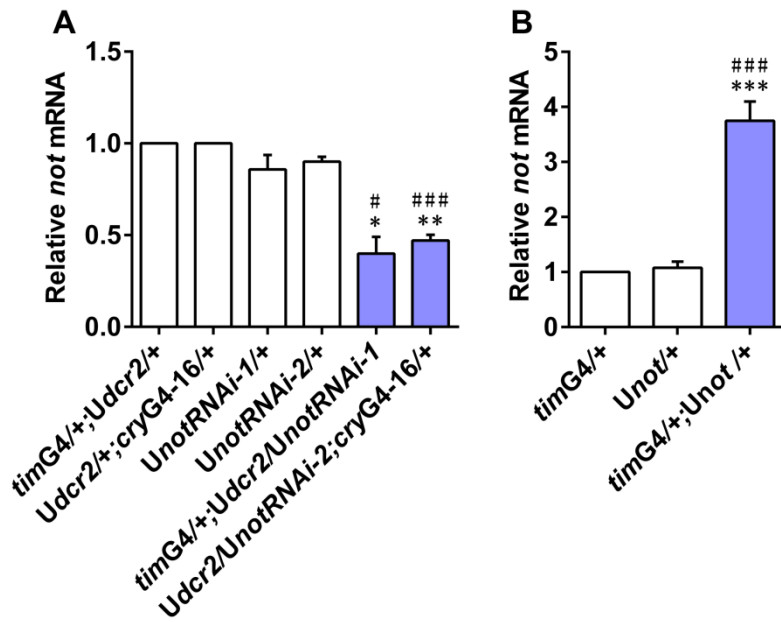

**Appendix Figure S7. Validation of the knock down or over-expression effects of *not* RNAi or over-expression fly lines.**

A, B Plots of relative mRNA abundance of *not* in whole head extracts of flies with *not* knocked down (A) or over-expressed (B) and controls determined by qRT-PCR ( $n=3$ ). Data information: Student's *t*-test,  $*/#P<0.05$ ,  $**/###P<0.01$ ,  $***/####P<0.001$ . Error bars represent SEM. \* compared with the GAL4 controls; # compared with the UAS controls. G4, GAL4; U, UAS.
