# Supplementary material
Source: PubMed Central journal article supplement (PMC6939192)
Supplement: EMBJ-39-e101259-s003.pdf [file EMBJ-39-e101259-s003.pdf]

**Figure 2B**

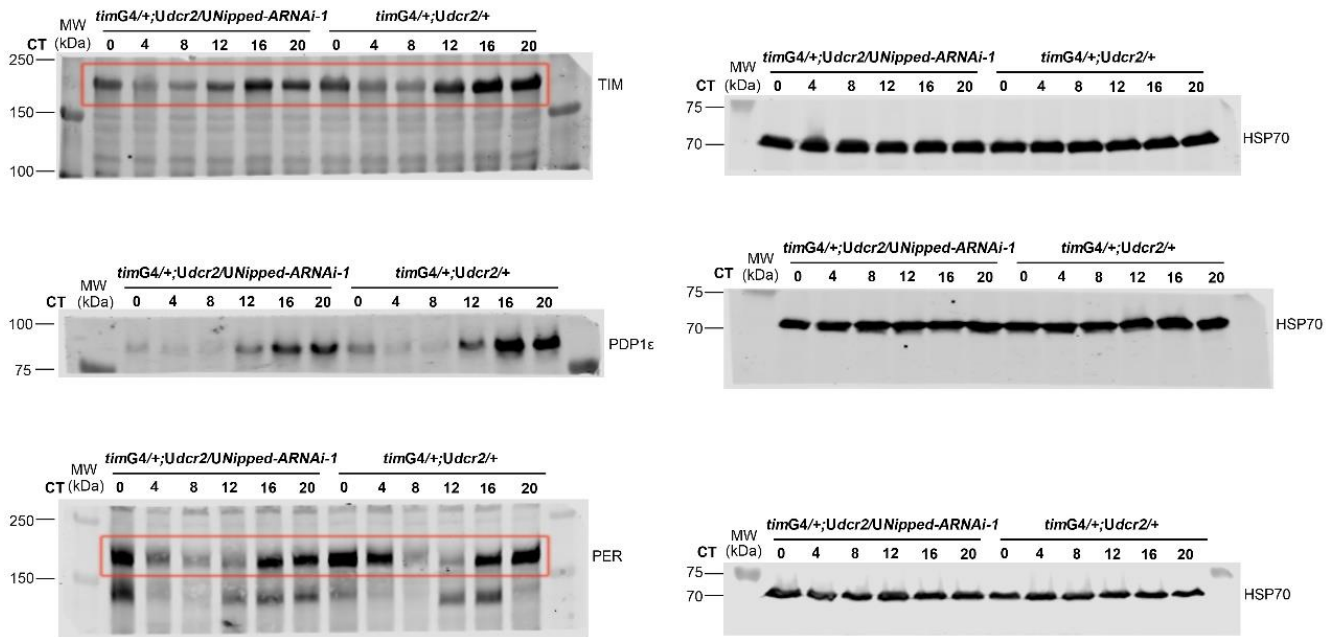

**Figure 2C Data are: TIM/HSP70 - fluorescence intensity**

| CT | <i>timG4/+;Udcr2UNipped-ARNAi-1</i> |          |          |          |          | <i>timG4/+;Udcr2/+</i> |          |          |          |          |
|----|-------------------------------------|----------|----------|----------|----------|------------------------|----------|----------|----------|----------|
|    | Repeat 1                            | Repeat 2 | Repeat 3 | Repeat 4 | Repeat 5 | Repeat 1               | Repeat 2 | Repeat 3 | Repeat 4 | Repeat 5 |
| 0  | 0.458                               | 0.413    | 0.464    | 0.382    | 0.283    | 0.548                  | 0.767    | 0.633    | 0.786    | 0.938    |
| 4  | 0.172                               | 0.273    | 0.303    | 0.282    | 0.143    | 0.307                  | 0.351    | 0.325    | 0.348    | 0.493    |
| 8  | 0.208                               | 0.231    | 0.235    | 0.122    | 0.099    | 0.264                  | 0.166    | 0.276    | 0.175    | 0.184    |
| 12 | 0.451                               | 0.525    | 0.248    | 0.279    | 0.321    | 0.686                  | 0.706    | 0.544    | 0.481    | 0.704    |
| 16 | 0.680                               | 0.859    | 0.447    | 0.501    | 0.608    | 1.000                  | 1.000    | 1.000    | 1.000    | 1.000    |
| 20 | 0.531                               | 0.787    | 0.614    | 0.601    | 0.518    | 0.753                  | 0.944    | 0.638    | 0.878    | 0.654    |

**Data are: PDP1 $\epsilon$ /HSP70 - fluorescence intensity**

| CT | <i>timG4/+;Udcr2UNipped-ARNAi-1</i> |          |          | <i>timG4/+;Udcr2/+</i> |          |          |
|----|-------------------------------------|----------|----------|------------------------|----------|----------|
|    | Repeat 1                            | Repeat 2 | Repeat 3 | Repeat 1               | Repeat 2 | Repeat 3 |
| 0  | 0.114                               | 0.120    | 0.171    | 0.238                  | 0.299    | 0.649    |
| 4  | 0.076                               | 0.100    | 0.079    | 0.107                  | 0.115    | 0.161    |
| 8  | 0.069                               | 0.056    | 0.095    | 0.072                  | 0.133    | 0.088    |
| 12 | 0.284                               | 0.278    | 0.247    | 0.447                  | 0.362    | 0.476    |
| 16 | 0.495                               | 0.487    | 0.459    | 1.000                  | 1.000    | 1.000    |
| 20 | 0.537                               | 0.416    | 0.562    | 1.021                  | 0.731    | 1.055    |

Data are: PER/HSP70 - fluorescence intensity

| CT | <i>timG4/+;Udcr2/UNipped-ARNAi-1</i> |          |          | <i>timG4/+;Udcr2/+</i> |          |          |
|----|--------------------------------------|----------|----------|------------------------|----------|----------|
|    | Repeat 1                             | Repeat 2 | Repeat 3 | Repeat 1               | Repeat 2 | Repeat 3 |
| 0  | 0.246                                | 0.356    | 0.264    | 1.000                  | 1.000    | 1.000    |
| 4  | 0.198                                | 0.181    | 0.140    | 0.362                  | 0.330    | 0.371    |
| 8  | 0.147                                | 0.093    | 0.101    | 0.145                  | 0.193    | 0.093    |
| 12 | 0.111                                | 0.194    | 0.097    | 0.138                  | 0.255    | 0.131    |
| 16 | 0.276                                | 0.251    | 0.160    | 0.362                  | 0.335    | 0.352    |
| 20 | 0.318                                | 0.460    | 0.259    | 0.666                  | 0.286    | 0.544    |
