# Supplementary material
Source: PubMed Central journal article supplement (PMC6939192)
Supplement: EMBJ-39-e101259-s004.pdf [file EMBJ-39-e101259-s004.pdf]

**Figure 4B**

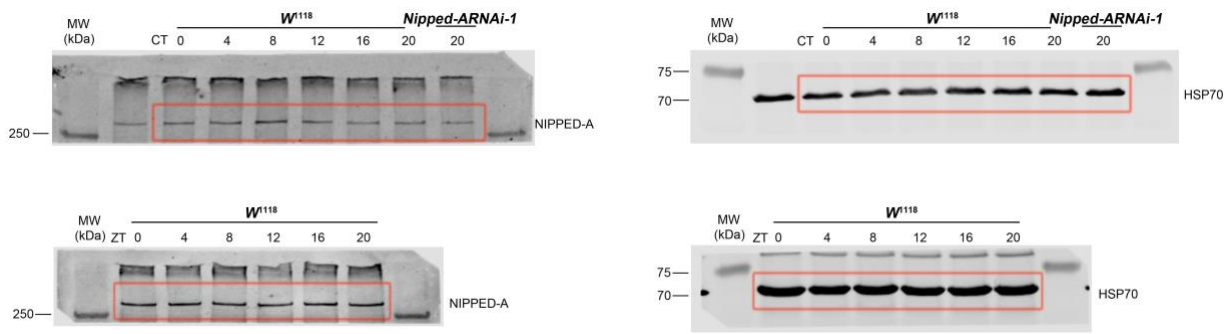

Data are: NIPPED-A/HSP70 in DD – fluorescence intensity

| CT | <i>W</i> <sup>118</sup> |          |          |          |          |
|----|-------------------------|----------|----------|----------|----------|
|    | Repeat 1                | Repeat 2 | Repeat 3 | Repeat 4 | Repeat 5 |
| 0  | 0.611                   | 1.577    | 1.331    | 1.026    | 1.280    |
| 4  | 1.092                   | 1.856    | 1.617    | 1.022    | 1.296    |
| 8  | 0.991                   | 1.716    | 2.570    | 1.613    | 1.291    |
| 12 | 1.278                   | 1.557    | 1.292    | 1.070    | 1.130    |
| 16 | 1.120                   | 1.205    | 1.003    | 1.235    | 1.520    |
| 20 | 1.000                   | 1.000    | 1.000    | 1.000    | 1.000    |

Data are: NIPPED-A/HSP70 in LD – fluorescence intensity

| ZT | <i>W</i> <sup>118</sup> |          |          |
|----|-------------------------|----------|----------|
|    | Repeat 1                | Repeat 2 | Repeat 3 |
| 0  | 0.897                   | 0.748    | 0.742    |
| 4  | 0.933                   | 1.096    | 0.908    |
| 8  | 0.920                   | 0.777    | 0.887    |
| 12 | 0.922                   | 0.851    | 0.950    |
| 16 | 1.000                   | 1.000    | 1.000    |
| 20 | 0.841                   | 1.074    | 1.055    |
